# Supplementary material
Source: PubMed Central journal article supplement (PMC7547712)
Supplement: 41386_2020_765_MOESM3_ESM.pdf [file 41386_2020_765_MOESM3_ESM.pdf]

**Supplemental Table 1.** Statistics of strain differences between LE and SD rats in static and dynamic measurements of the dopamine system.

|                                   |          | Long Evans           | Sprague Dawley       | Statistic Results                                                                                                        |
|-----------------------------------|----------|----------------------|----------------------|--------------------------------------------------------------------------------------------------------------------------|
| <b>DAT intensity</b>              | <b>M</b> | 460 ± 46<br>(n=5)    | 2391 ± 258<br>(n=4)  | Strain: F (1, 14) = 128.9 P < 0.0001 ***<br>Sex: F (1, 14) = 15.60 P = 0.0015 **<br>Int: F (1, 14) = 13.68 P = 0.0024 ** |
|                                   | <b>F</b> | 428 ± 39<br>(n=5)    | 1410 ± 112<br>(n=4)  |                                                                                                                          |
| <b>TH intensity</b>               | <b>M</b> | 1821 ± 118<br>(n=4)  | 2440 ± 277<br>(n=4)  | Strain: F (1, 12) = 0.5285 P = 0.4812<br>Sex: F (1, 12) = 0.02840 P = 0.8690<br>Int: F (1, 12) = 2.956 P = 0.1112        |
|                                   | <b>F</b> | 2299 ± 300<br>(n=4)  | 2048 ± 28<br>(n=4)   |                                                                                                                          |
| <b>TH<sup>+</sup> cell number</b> | <b>M</b> | 38 ± 9<br>(n=4)      | 120 ± 32<br>(n=4)    | Strain: F (1, 12) = 5.137 P = 0.0427*<br>Sex: F (1, 12) = 2.174 P = 0.1661<br>Int: F (1, 12) = 3.414 P = 0.0895          |
|                                   | <b>F</b> | 45 ± 12<br>(n=4)     | 53 ± 19<br>(n=4)     |                                                                                                                          |
| <b>TH<sup>+</sup> cell volume</b> | <b>M</b> | 269 ± 14<br>(n=4)    | 275 ± 38<br>(n=4)    | Strain: F (1, 12) = 0.6988 P = 0.4195<br>Sex: F (1, 12) = 0.3224 P = 0.5806<br>Int: F (1, 12) = 1.068 P = 0.3217         |
|                                   | <b>F</b> | 283 ± 35<br>(n=4)    | 228 ± 23<br>(n=4)    |                                                                                                                          |
| <b>Baseline Dopamine</b>          | <b>M</b> | 1.54 ± 0.49<br>(n=5) | 0.76 ± 0.17<br>(n=8) | Strain: F (1, 28) = 6.072 P = 0.0201*<br>Sex: F (1, 28) = 5.629 P = 0.0248*<br>Int: F (1, 28) = 0.3786 P = 0.5433        |
|                                   | <b>F</b> | 0.79 ± 0.25<br>(n=6) | 0.32 ± 0.05<br>(n=8) |                                                                                                                          |
| <b>Dopamine Release</b>           | <b>M</b> | 240 ± 22<br>(n=5)    | 343 ± 32<br>(n=8)    | Strain: F (1, 23) = 3.964 P = 0.0585<br>Sex: F (1, 23) = 11.90 P = 0.0022**<br>Int: F (1, 23) = 1.555 P = 0.2250         |
|                                   | <b>F</b> | 170 ± 35<br>(n=6)    | 194 ± 38<br>(n=8)    |                                                                                                                          |
| <b>Baseline Locomotion</b>        | <b>M</b> | 442 ± 95<br>(n=5)    | 74 ± 19<br>(n=8)     | Strain: F (1, 23) = 30.73 P < 0.0001****<br>Sex: F (1, 23) = 2.373 P = 0.1371<br>Int: F (1, 23) = 1.077 P = 0.3103       |
|                                   | <b>F</b> | 298 ± 91<br>(n=6)    | 46 ± 12<br>(n=8)     |                                                                                                                          |
| <b>Stimulated Locomotion</b>      | <b>M</b> | 757 ± 156<br>(n=5)   | 492 ± 65<br>(n=8)    | Strain: F (1, 23) = 3.271 P = 0.0836<br>Sex: F (1, 23) = 0.05017 P = 0.8247<br>Int: F (1, 23) = 0.09390 P = 0.7620       |
|                                   | <b>F</b> | 771 ± 150<br>(n=6)   | 398 ± 21<br>(n=8)    |                                                                                                                          |

Values are expressed as mean ± SEM. For dopamine release and stimulated locomotion data were taken at time of maximum effect.
